# Supplementary material
Source: publisher figshare collection journal article supplement (https://tandf.figshare.com/ndownloader/files/15522170)

Appendix A: Individual transmissibility responses of 21 participants in two positions (forward lean, backward lean) at 24 anatomical locations.


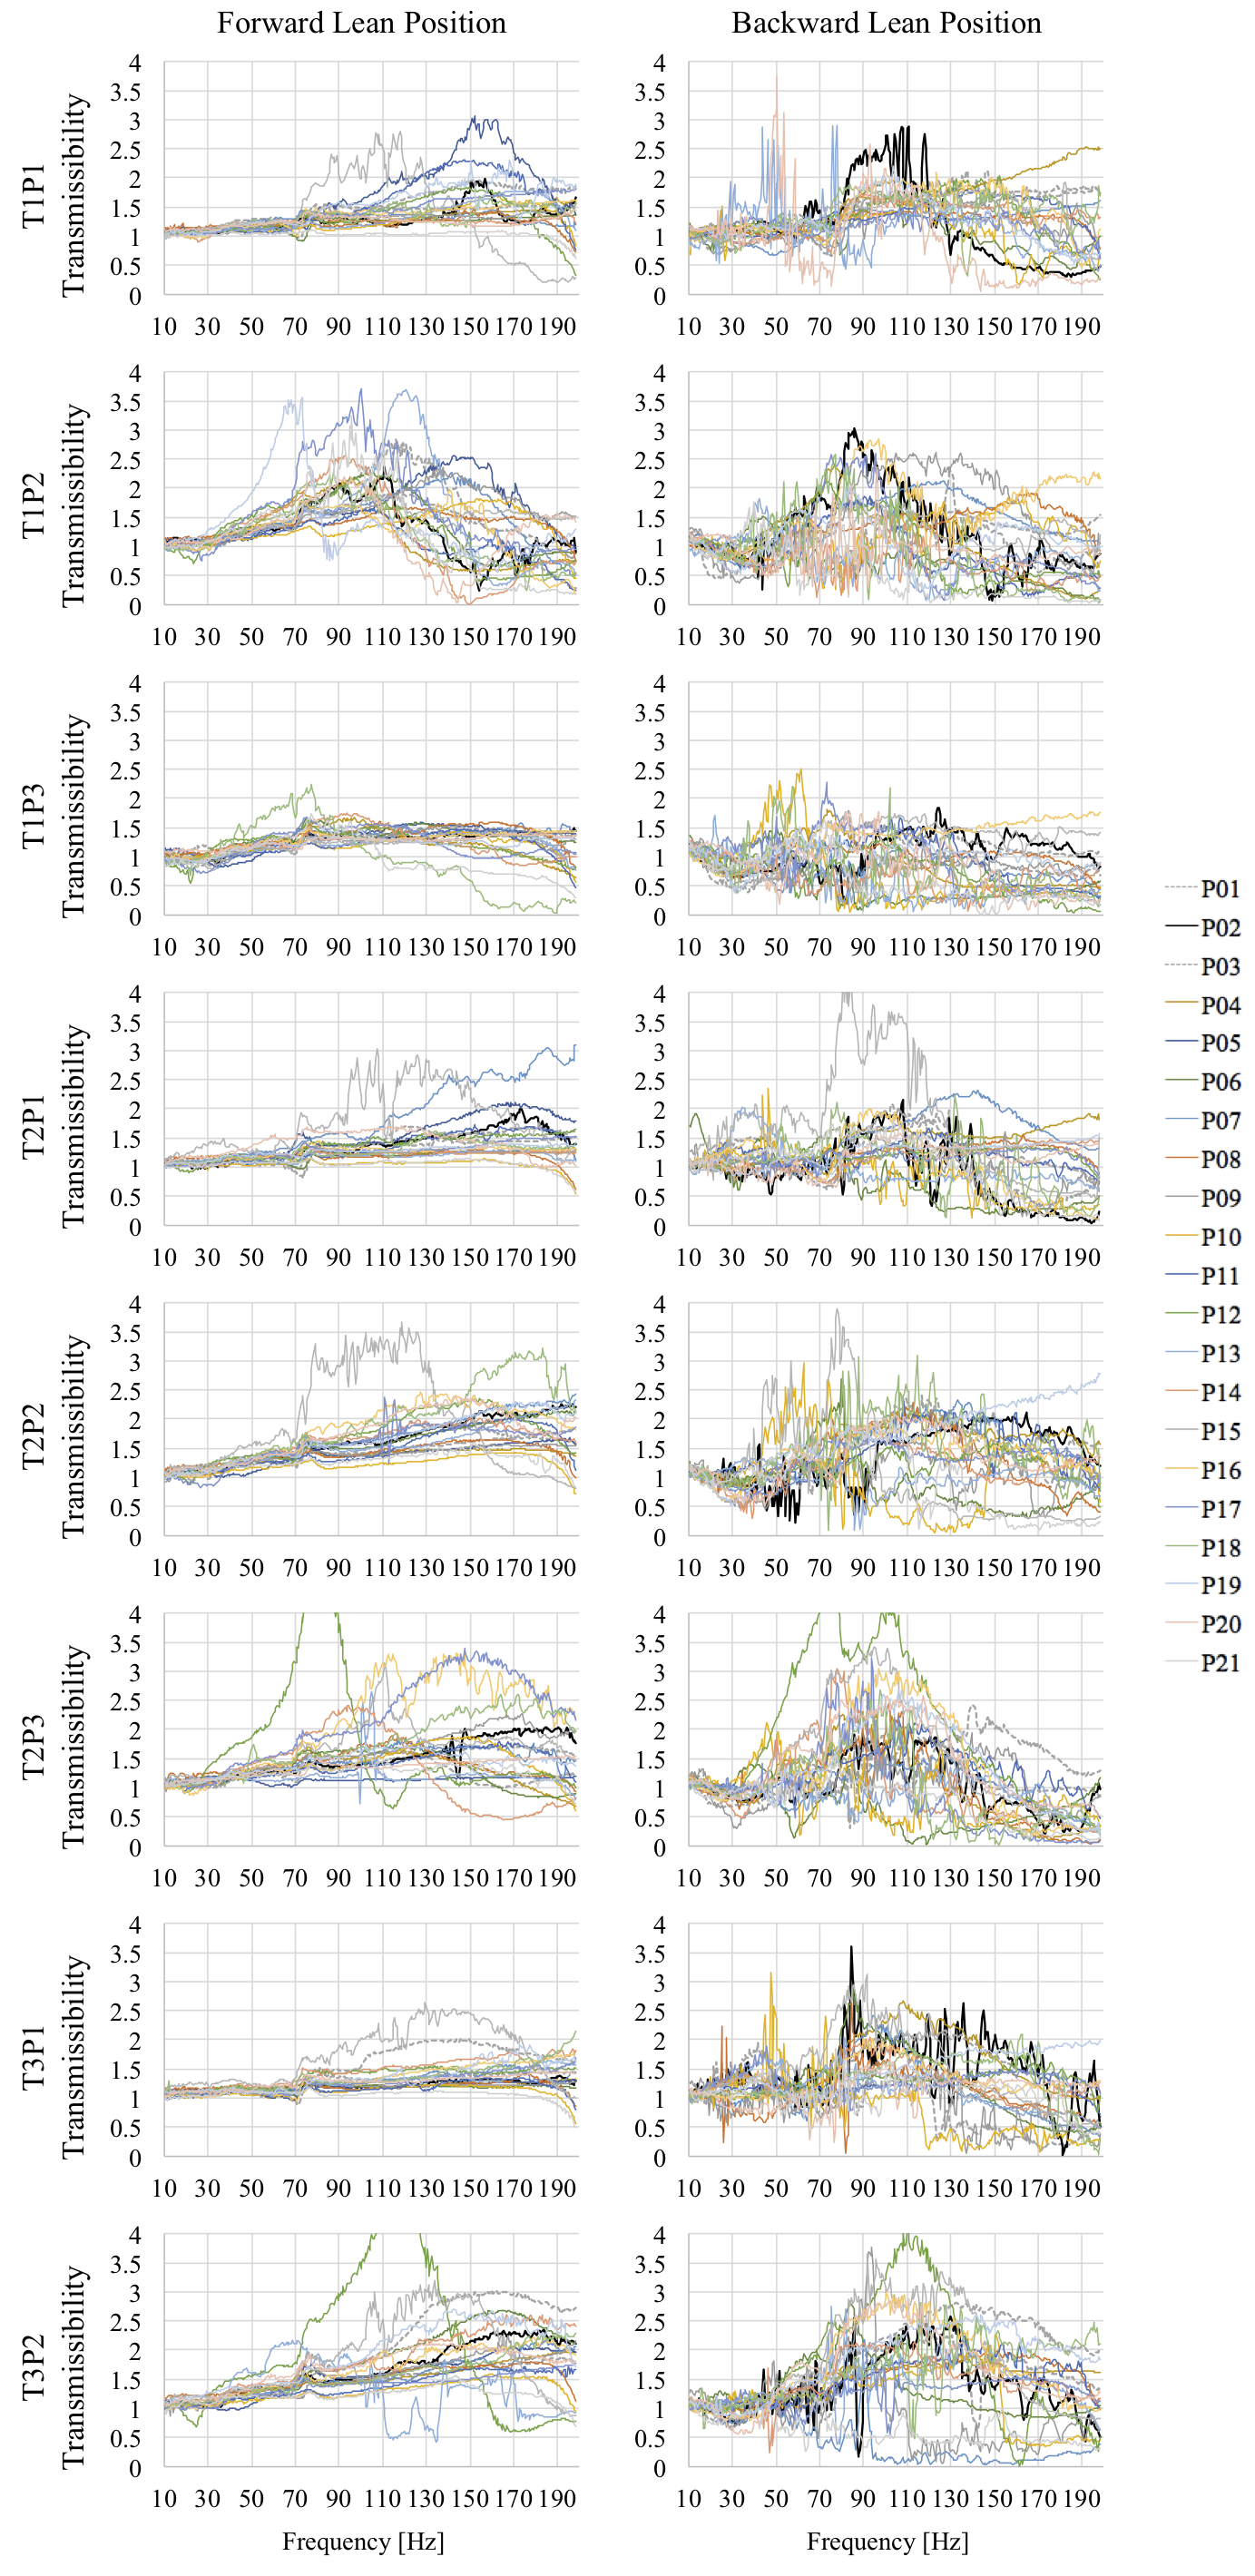


Appendix A: Individual transmissibility responses of 21 participants in two positions (forward lean, backward lean) at 24 anatomical locations.


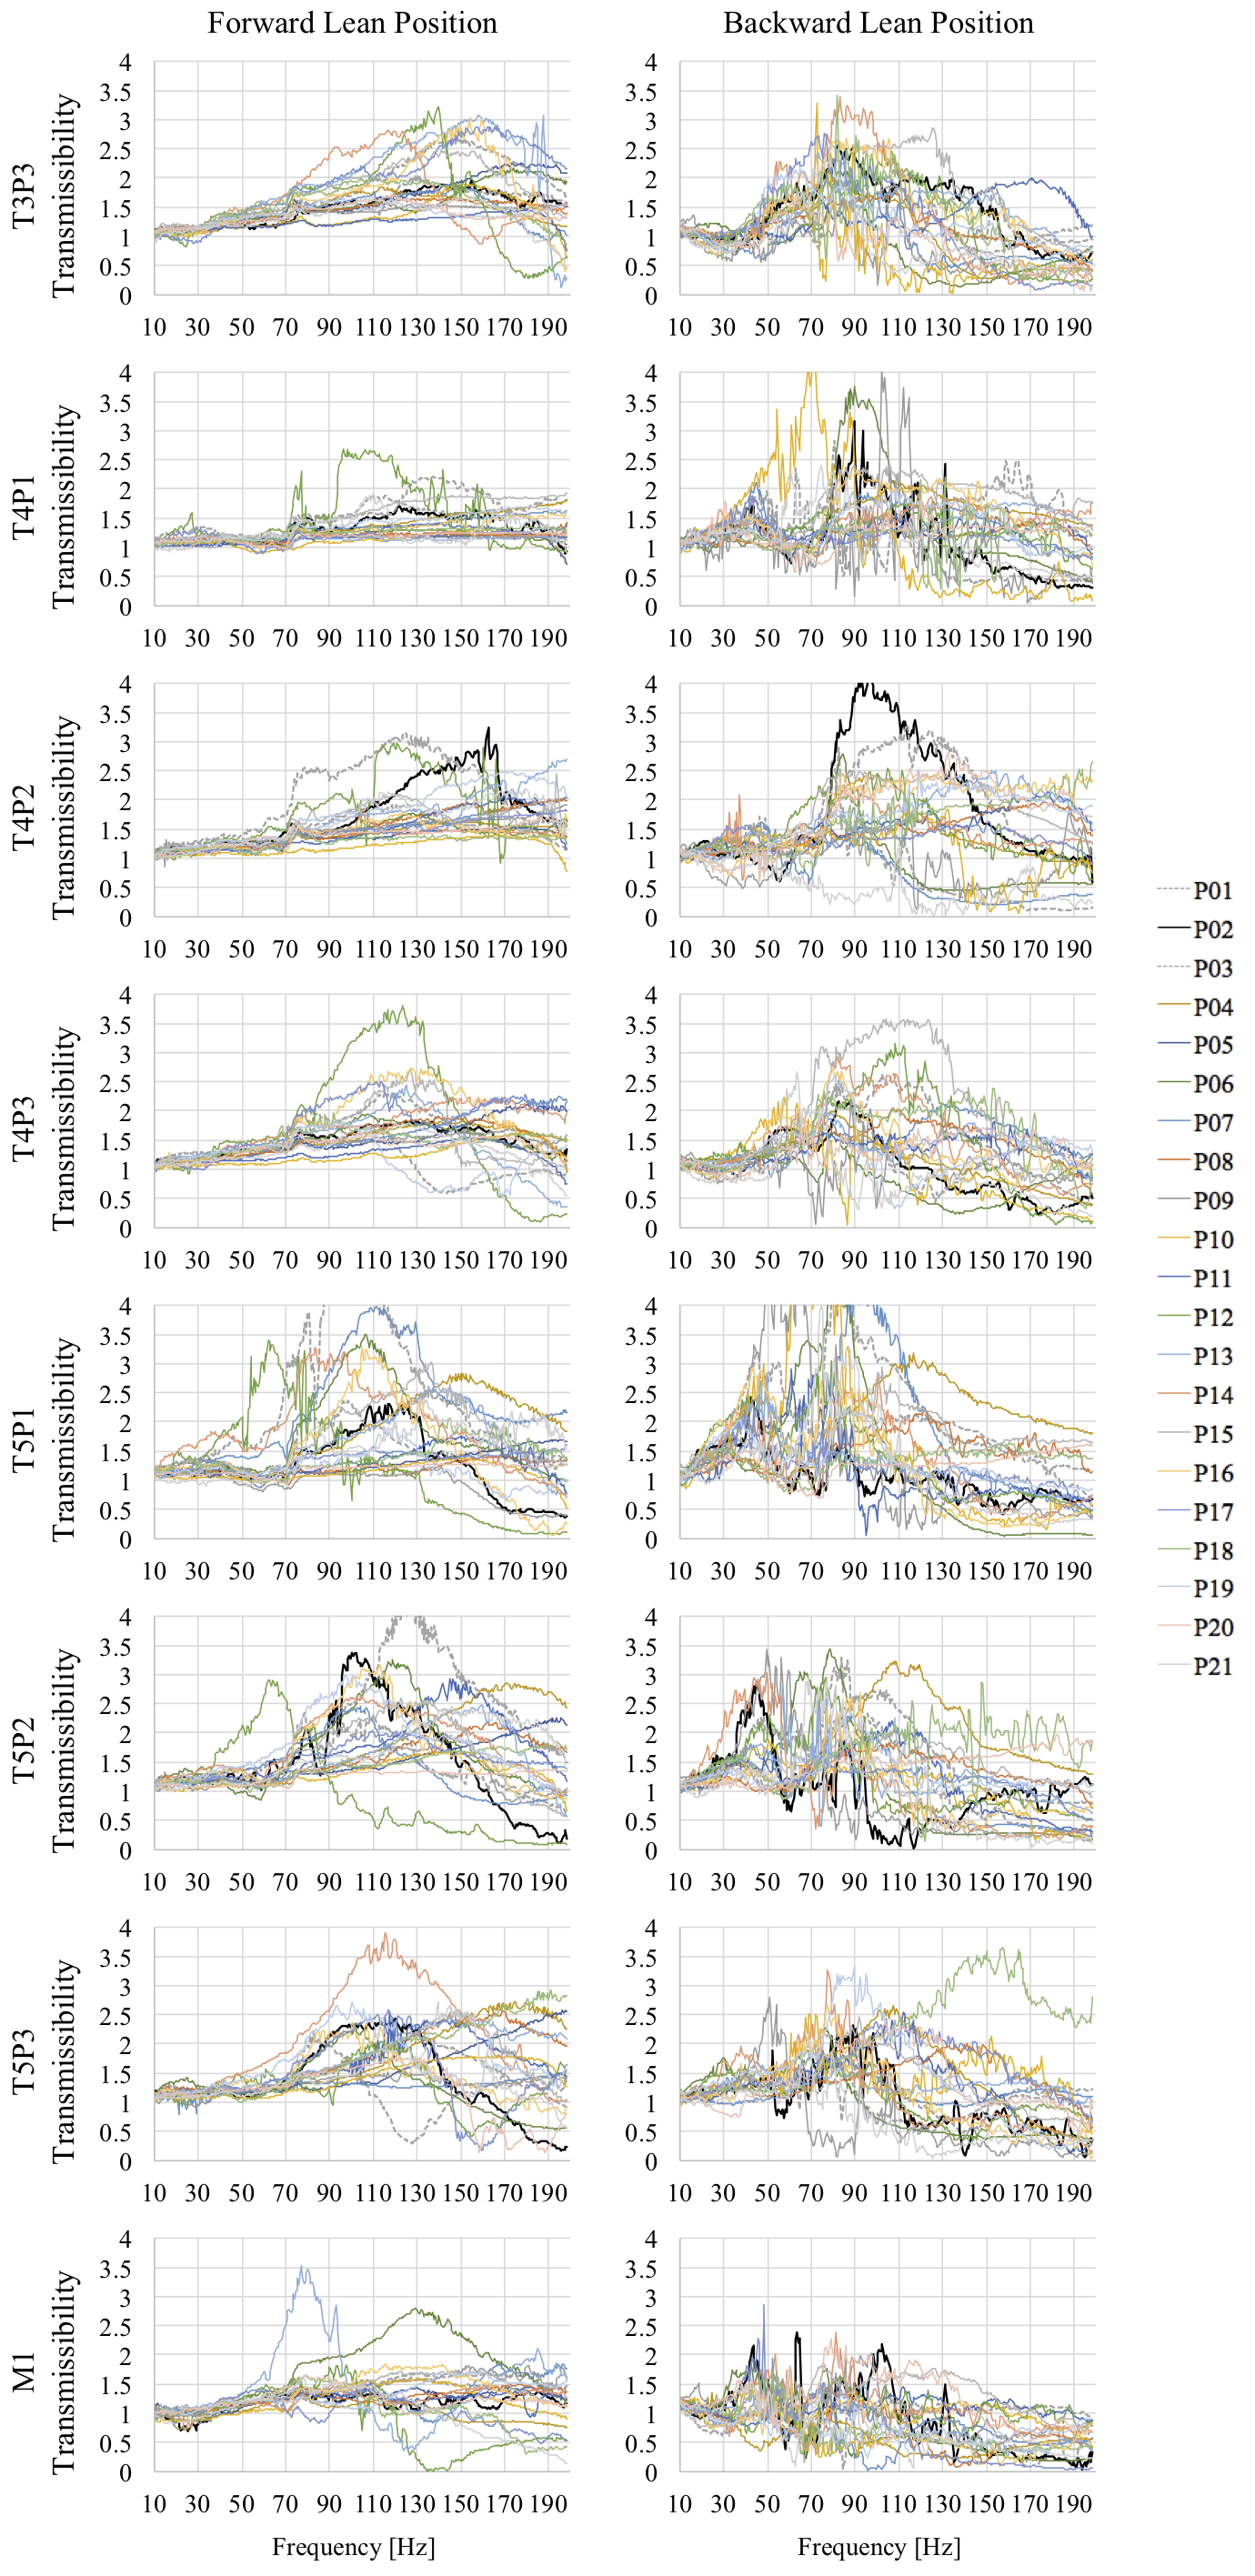


Appendix A: Individual transmissibility responses of 21 participants in two positions (forward lean, backward lean) at 24 anatomical locations.


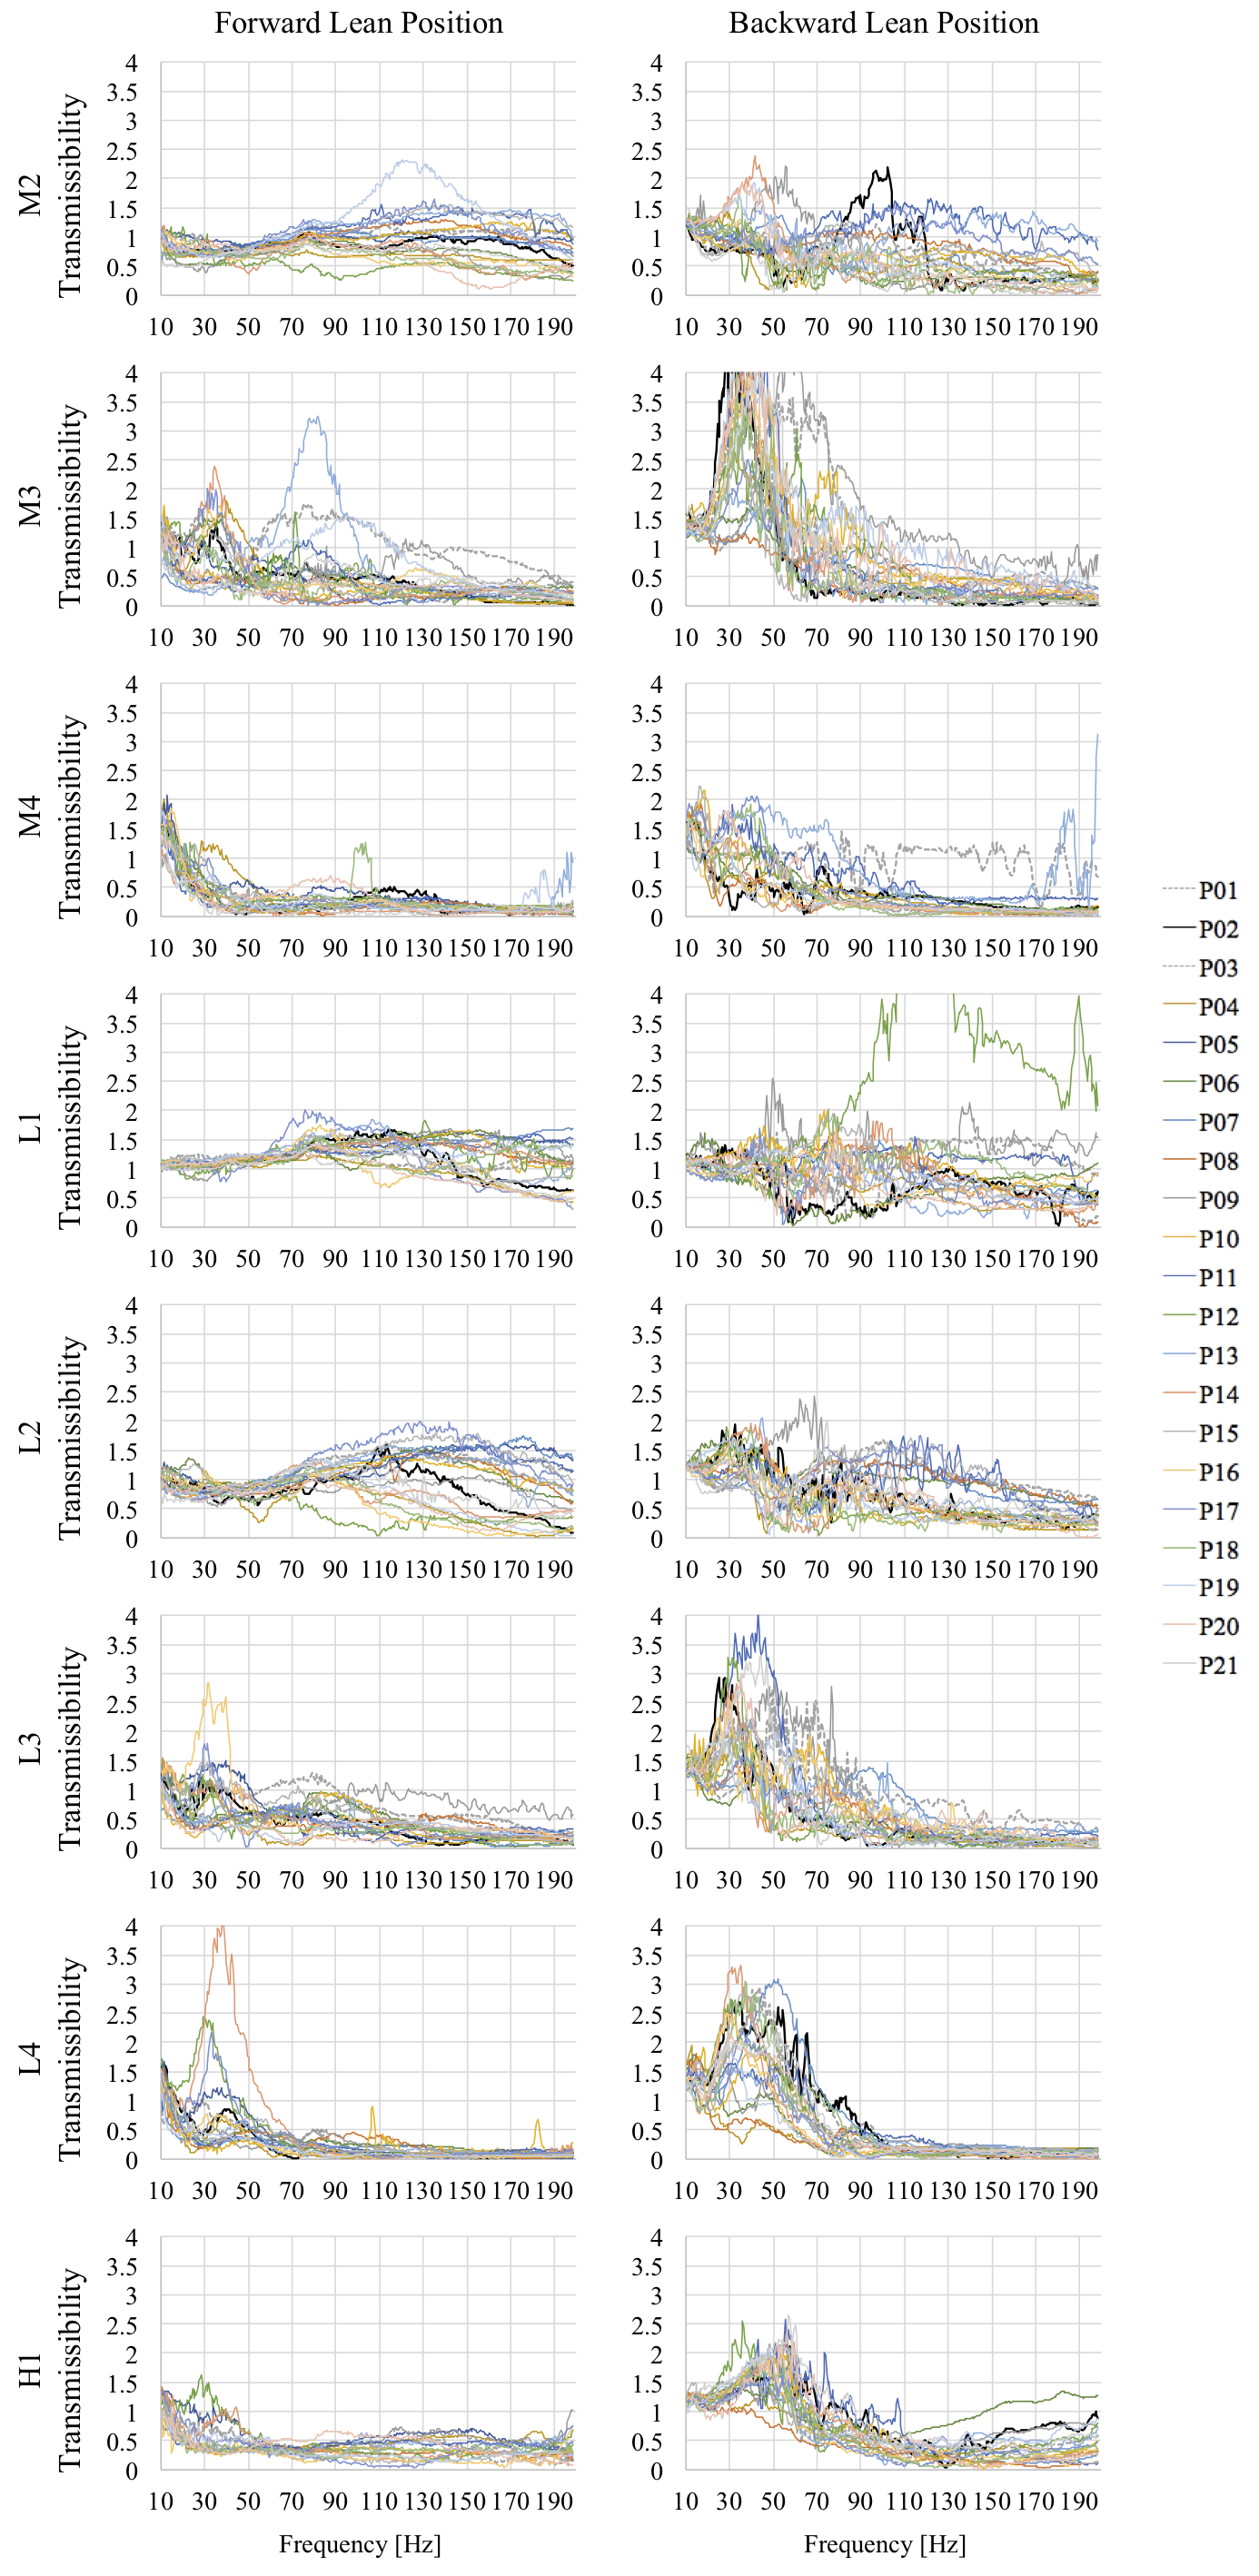

Supplement: Supplementary file 1 [file 15522170]
